# Supplementary material for: Decreased sphingomyelin (t34:1) is a candidate predictor for lung squamous cell carcinoma recurrence after radical surgery: a case-control study
Source: Springer Nature journal article supplement (doi:10.1186/s12885-021-08948-5), 2021-11-17
Supplement: MOESM1 [file 19876544]

| Group         | Case | Tissue weight (mg) |
|---------------|------|--------------------|
| Recurrent     | 1    | 20                 |
|               | 2    | 15.2               |
|               | 3    | 69.6               |
|               | 4    | 20.6               |
|               | 5    | 19.8               |
| Non-recurrent | 1    | 13.5               |
|               | 2    | 24.4               |
|               | 3    | 20.7               |
|               | 4    | 9                  |
|               | 5    | 16.7               |
|               | 6    | 1.5                |

**Supplemental Table 1.** Weights of the frozen tissue samples.

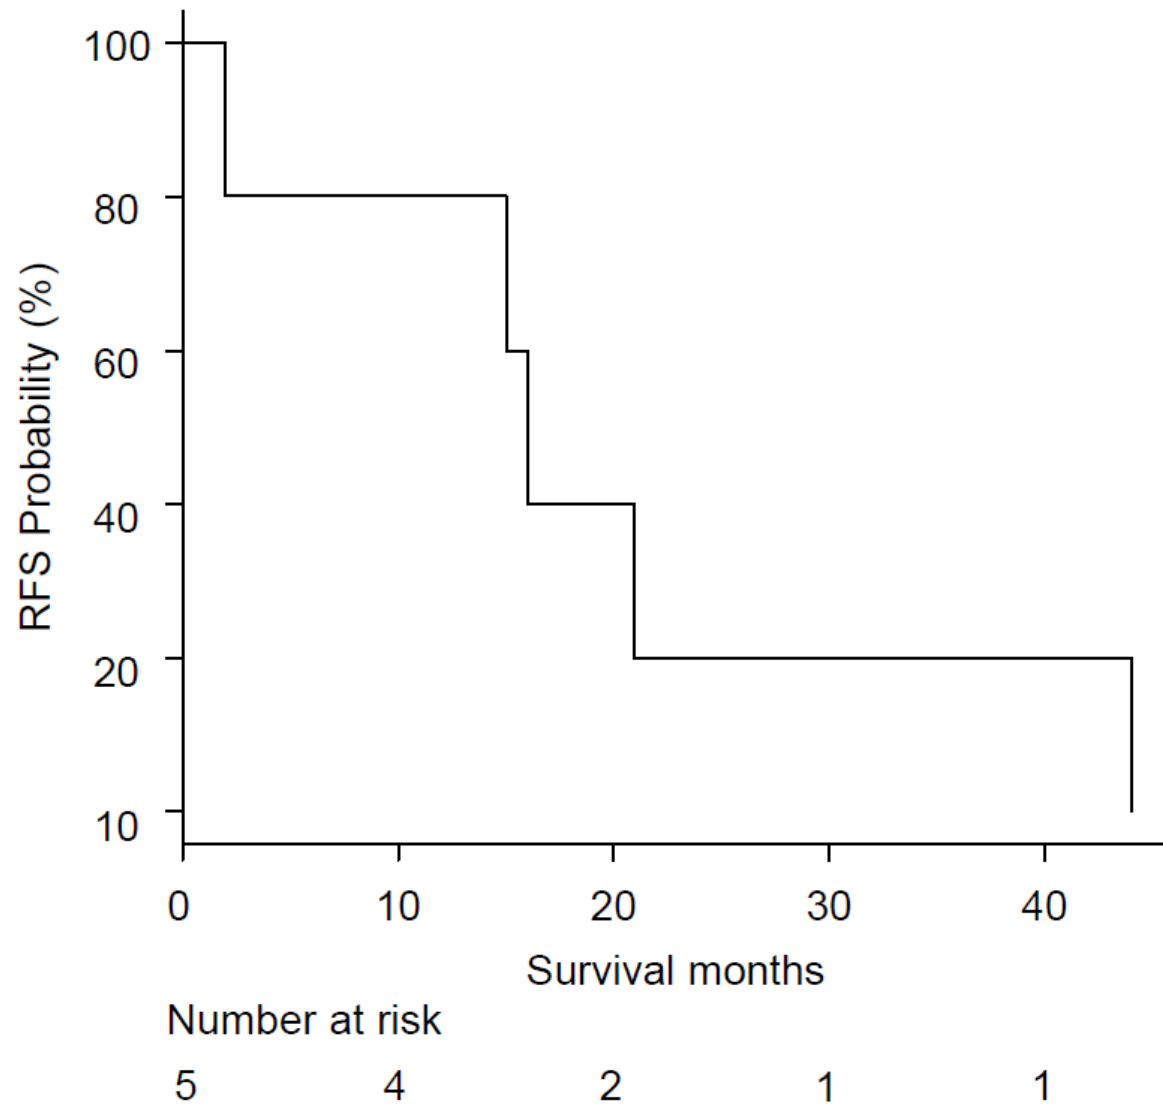

**Supplemental Figure 1.** Recurrence-free survival curve of the recurrent group.

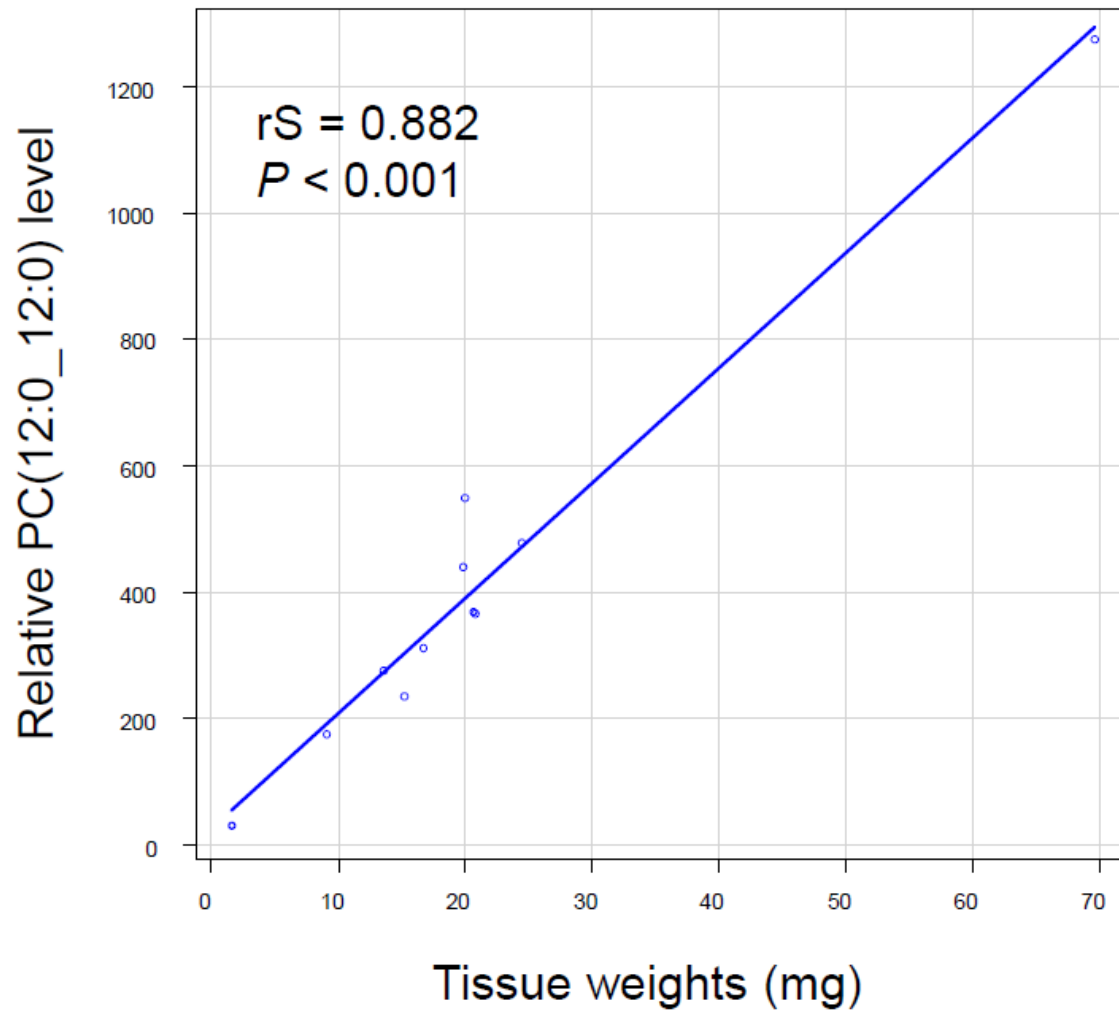

**Supplemental Figure 2.** Correlation between relative PC(12:0\_12:0) level and sample tissue weights.

Abbreviations: PC, phosphatidylcholine; rS, Spearman's rank correlation coefficient.

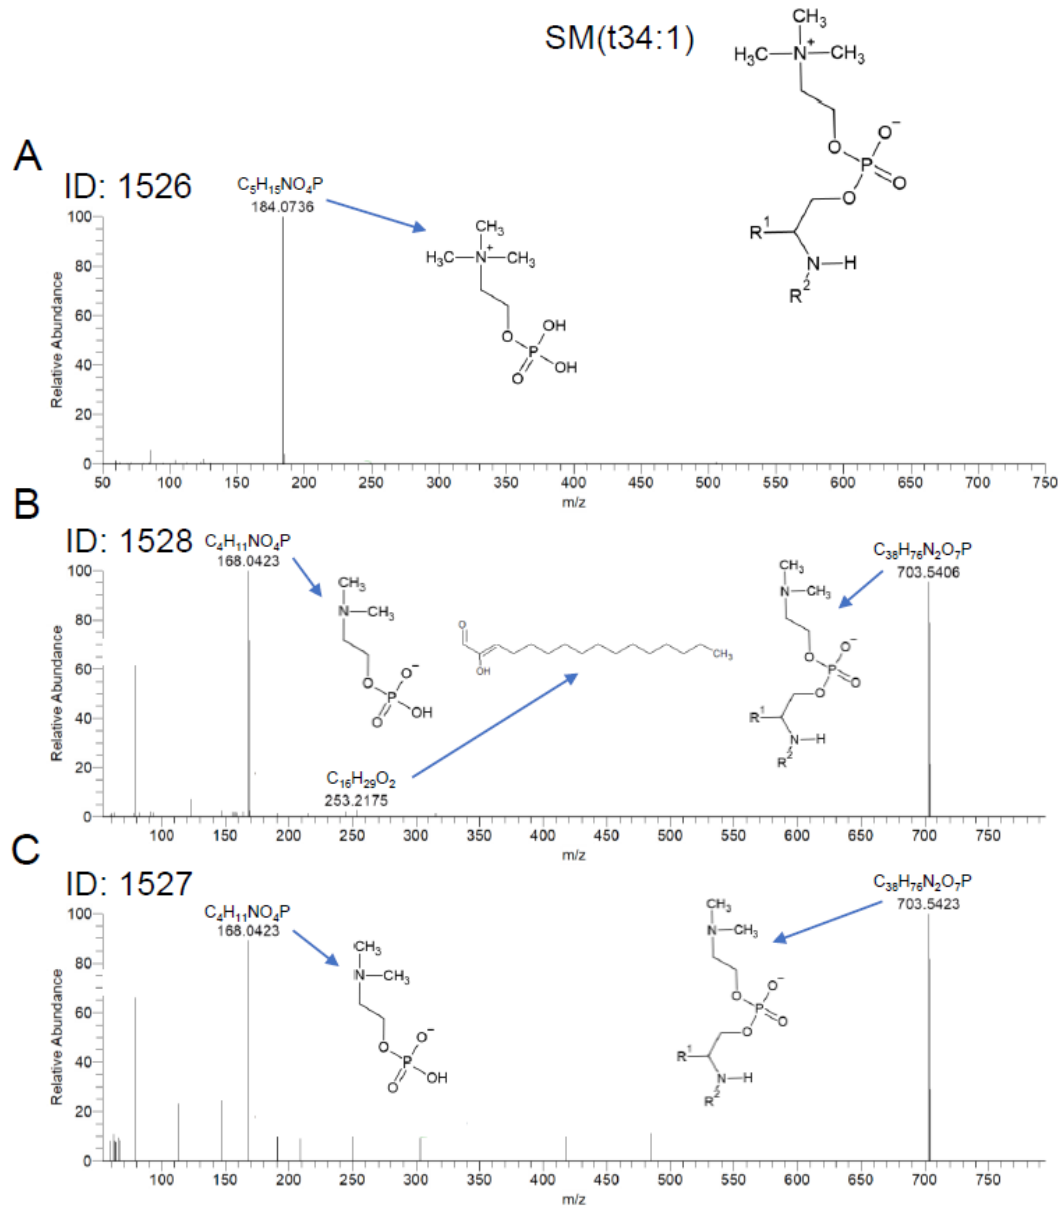

**Supplemental Figure 3.** Tandem mass spectrometry analyses of the final three candidate predictors: [sphingomyelin (SM)(t34:1)+H]<sup>+</sup> (ID: 1526) (A), [SM(t34:1)+HCOO]<sup>-</sup> (ID: 1528) (B), and [SM(t34:1)+HCOO]<sup>-</sup> (ID: 1527) (C).  $C_5H_{15}NO_4P$ , phosphocholine head;  $C_4H_{11}NO_4P$ , phosphocholine head with a loss of a methyl group;  $C_{38}H_{75}N_2O_7P$ , SM(t34:1) with a loss of a methyl group;  $C_{15}H_{25}O_2$ , spingoid base.

SMS (n = 524)

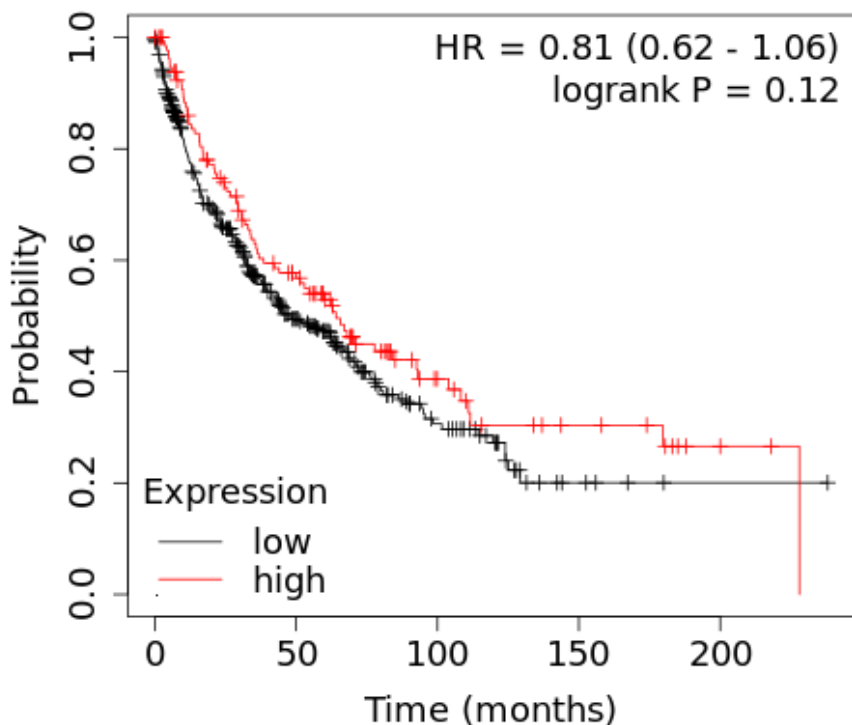

|      | 0   | 50  | 100 | 150 | 200 |
|------|-----|-----|-----|-----|-----|
| low  | 390 | 117 | 33  | 5   | 1   |
| high | 134 | 62  | 21  | 10  | 3   |

SMase (n = 524)

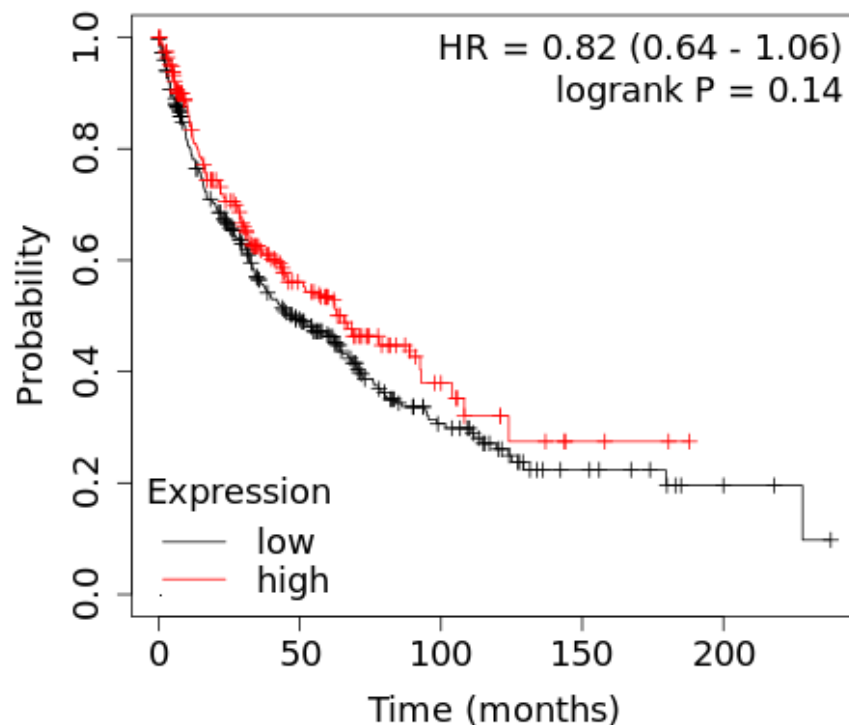

|      | 0   | 50  | 100 | 150 | 200 |
|------|-----|-----|-----|-----|-----|
| low  | 326 | 116 | 39  | 12  | 4   |
| high | 198 | 63  | 15  | 3   | 0   |

**Supplemental Figure 4.** Overall survival curves for mRNA expression levels of SMS and SMase on lung SQCC. High and low mRNA expression groups are shown as red and black lines, respectively. HR, 95% confidence intervals and log-rank *P*-values are presented. Abbreviations: HR, hazard ratio; SMase, sphingomyelinase; SMS, sphingomyelin synthase; SQCC, squamous cell carcinoma.

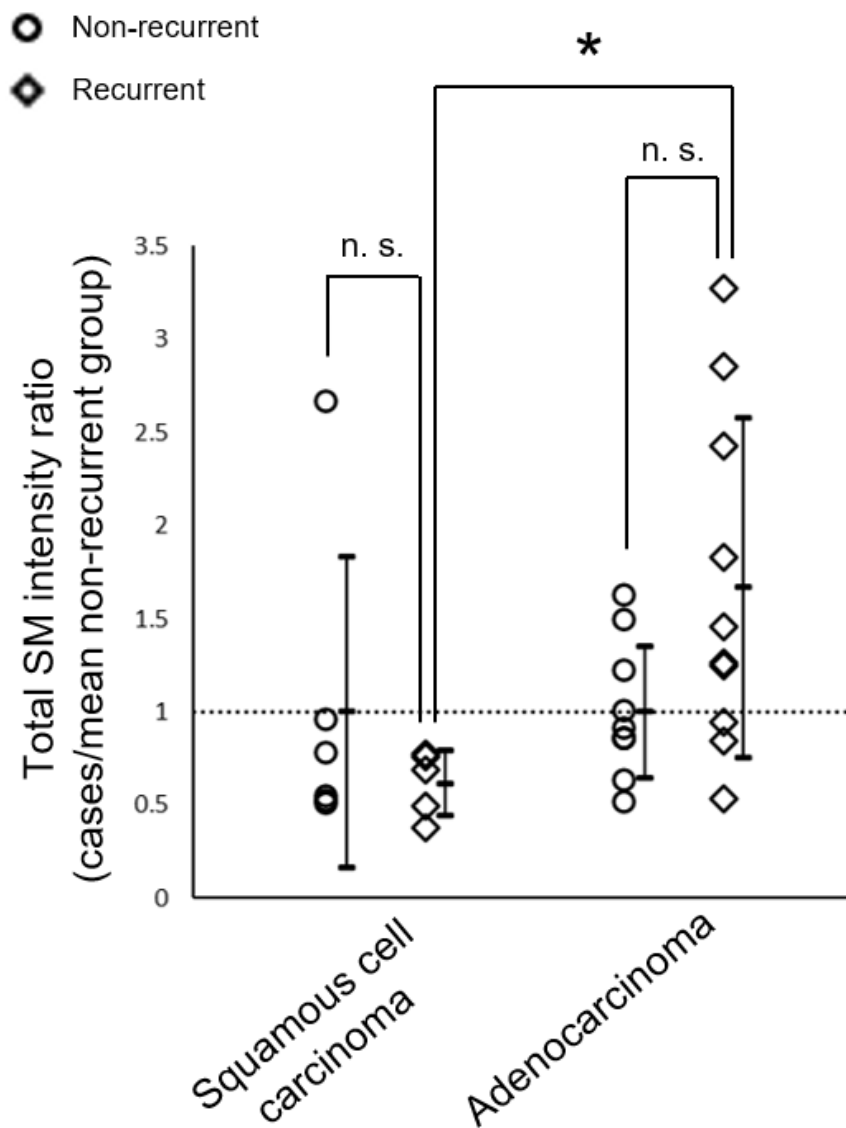

**Supplemental Figure 5.** Comparison of total SM intensity ratio among the non-recurrent and recurrent groups of the squamous cell carcinoma and adenocarcinoma cohorts. Asterisks indicate significant differences ( $*P < 0.05$ ) in the Welch's t-test. Abbreviations: n.s., no significance; SM, sphingomyelin.

**A**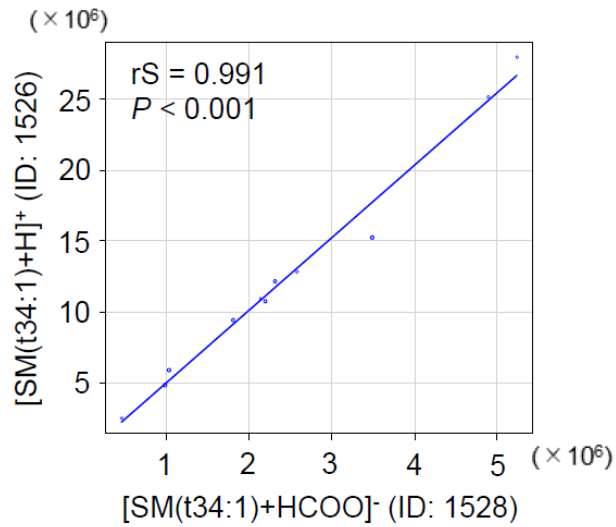**B**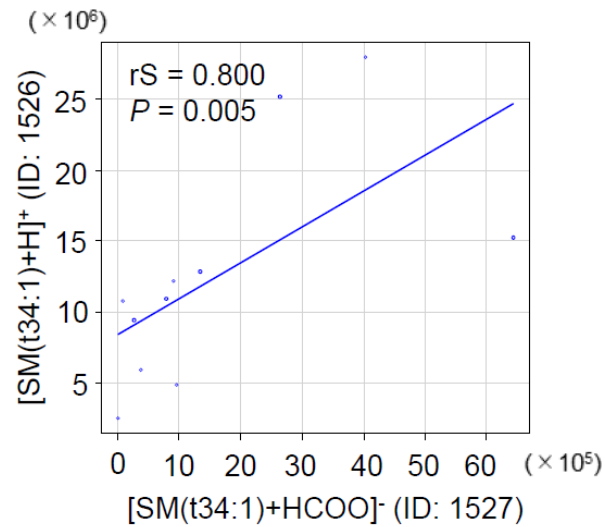**C**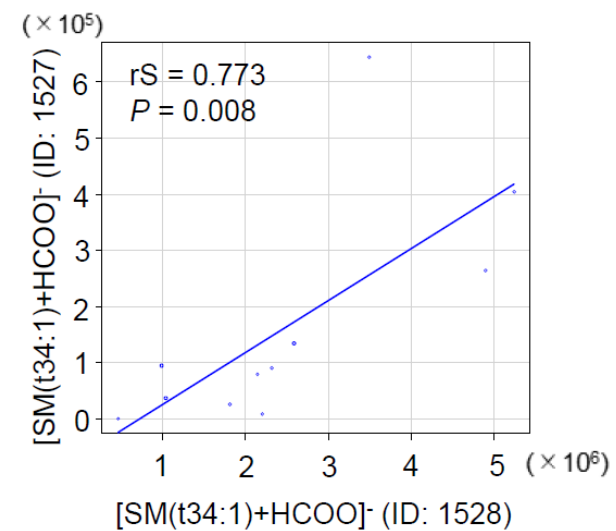

**Supplemental Figure 6.** Correlation among the final three candidate predictors. Abbreviations: rS, Spearman's rank correlation coefficient; SM, sphingomyelin.

|                               | SQCC (n = 11)   | ADC (n = 20) | <i>P</i> -value |
|-------------------------------|-----------------|--------------|-----------------|
| Smoking history (+/-)         | 11/0            | 13/7         | 0.033*          |
| Median Brinkman index (range) | 1240 (180-3000) | 538 (0-2100) | 0.012*          |

**Supplemental Table 2.** Comparison of smoking history and the Brinkman index between the SQCC and ADC groups.

Asterisks indicate significant differences ( $*P < 0.05$ ) in the Fisher exact test (Smoking history) and the Mann-Whitney U-test (Brinkman Index) between the two groups.

Abbreviations: ADC, adenocarcinoma; SQCC, squamous cell carcinoma.
